1  
2  
3  
4  
5  
6  
7  
8  
9  
10  
11  
12  
13  
14  
15  
16  
17  
18

**Group Size as a Trade Off Between Fertility and Predation Risk:  
Implications for Social Evolution**

**R.I.M. Dunbar<sup>1,2</sup>**

**Padraig Mac Carron<sup>1</sup>**

- 1) Department of Experimental Psychology, University of Oxford, New Radcliffe House, Oxford OX1 3UD, UK
- 2) Department of Computer Science, Aalto University, Espoo, Finland

Corresponding Author: email: [robin.dunbar@psy.ox.ac.uk](mailto:robin.dunbar@psy.ox.ac.uk)

# Abstract

Cluster analysis reveals a fractal pattern in the sizes of baboon groups, with peaks at ~20, ~40, ~80 and ~160. Although all baboon species individually exhibit this pattern, the two largest are mainly characteristic of the hamadryas and gelada. We suggest that these constitute three pairs of linear oscillators (20/40, 40/80 and 80/160), where in each case the higher value is set by limits on female fertility and the lower by predation risk. The lower pair of oscillators form an ESS in woodland baboons, with choice of oscillator being determined by local predation risk. Female fertility rates would naturally prevent baboons from achieving the highest oscillator with any regularity; nonetheless, hamadryas and gelada have been able to break through this fertility ‘glass ceiling’ and we suggest that they have been able to do so by using substructuring (based partly on using males as ‘hired guns’). This seems to have allowed them to increase group size significantly so as to occupy higher predation risk habitats (thereby creating the upper oscillator).

**Key words:** social organisation, fission, fertility, predation risk, bodyguard hypothesis

## Introduction

Groups are of fundamental importance in an evolutionary context for two reasons. First, they provide the demographic context in which animals play out their individual social and reproductive strategies. The size and demographic structure of the group in which an individual lives determines its behavioural and strategic options: if you don't have a sister, you cannot form an alliance with sisters, even though this may be the optimal thing to do (Altmann & Altmann 1979; Dunbar 1979). Second, group size is the key interface between the animal and its environment and, because primates, in particular, solve many of their ecological challenges socially, group size will often be a crucial feature of their ecological success. Understanding the factors that determine the size of groups that individuals live in is thus essential if we are to fully understand the processes that lie behind primate evolutionary history, and the particular behaviour of extant species. Despite this, the determinants of group size for any primate species have not been a significant focus of interest for several decades, and our understanding remains disappointingly poor and often very informal.

For all animals, group size is ultimately a tradeoff between costs and benefits. For primates (and most cursorial mammals), the principal benefits arise from protection against predation (Altmann & Altmann 1970; Cowlishaw 1994; Shultz et al. 2004; Cheney et al. 2004; Adamczak & Dunbar 2008; Lehmann & Dunbar 2009a; Willems & Hill 2009; Shultz & Finlayson 2010; Bettridge & Dunbar 2012). The costs arise from a combination of indirect costs (increased day journey length and foraging demand: Dunbar et al. 2009) and direct costs (competition between group members, and in particular the consequences this has for female fertility: Dunbar 2018). In this paper, we explore how these play out to influence social group size in baboons.

Predation by cursorial predators (principally lion, leopard and hyaena) is a serious problem faced by baboons (Altmann & Altmann 1970; Cowlishaw 1994; Bettridge & Dunbar 2012), especially at night when these predators are most active and primates are vulnerable due to their poor night vision. Not only do the densities of predators place constraints on the biogeographic distributions of all terrestrial primates (Lehmann & Dunbar 2009a), they also dictate minimum group size (Dunbar et al. 2009; Bettridge & Dunbar 2012). Some evidence of the significance of this for baboons is provided by a rare case of group fusion: two groups in the Mikumi National Park (Tanzania) whose sizes had progressively declined over time to 11 and 13 due to high mortality rates fused to create a group of 24 individuals (Hawkins 1999). Not only were both of the original groups below the size for demographic viability (~17 individuals: Dunbar et al. 2018), but they were also below the minimum group size (16.3) predicted for this site by the local predator density (Bettridge et al. 2010). Fusing placed both groups in the demographic 'safe zone'.

In contrast, the substantive costs of group-living seem to arise from the impact that this has on female fertility, rather than access to resources *per se*. In mammals, female reproductive endocrinology is extremely sensitive to stress: even low levels of stress can destabilise it, resulting in increased levels of infertility, and in some cases even the complete suppression of puberty (Bowman et al. 1978; Abbott et al. 1981, 1986, 1988; Seifer & Collins 1990). The mechanism for this is well understood pharmacologically: high levels of  $\beta$ -endorphins produced in response to social or physical stress block the production of GnRH in the hypothalamus, with the result that the pituitary fails to produce the lutenising hormone (LH) surge required to trigger ovulation, leading to anovulatory (and hence infertile) menstrual cycles (Zacur et al. 1976; Seifer & Collins 1990; Laatikainen 1991; von Borell et al. 2007; Einarsson et

al. 2008). A decline in fertility with either rank (Dunbar 1980; Smuts & Nicholson 1989; Altmann & Alberts 2003; Garcia et al. 2006; Pusey & Schroepfer-Walker 2013) or group size (van Schaik 1983; Dunbar 1989; Srivastava & Dunbar 1996; Hill et al. 2000; Borries et al. 2008) has been widely documented in primates, and seems to be characteristic of mammals as a whole (Dunbar 2018). Since the same endocrinological mechanism underpins human and primate infertility (An et al. 2013; Schliep et al. 2015; Pettay et al. 2016), and stress has been an identified factor in human infertility (An et al. 2013; Schliep et al. 2015; Pettay et al. 2016), similar effects have also been noted in humans: fertility declines with harem size in ethnographic societies (Muhsam 1956; Smith & Kunz 1976; Chojnacka 1980; Bean & Mineau 1986; Borgerhof Mulder 1989).

Ecologists have invariably attributed the decline in fertility with rank or group size to reduced food intake as a result of scramble competition. In fact, starvation itself triggers the endorphin system and thereby precipitates infertility (Dobson et al. 2012, Clarke 2014), so the effect may be due to stress rather than shortage of nutrients *per se*. While lack of food can certainly cause the reproductive system to shut down, this usually happens only in cases where extreme starvation or excessive exercise (e.g. athletes) results in insufficient fat reserves to support pregnancy (Smith 1947; Dean 1949; McClure 1968; Warren & Perlroth 2001; Kirchengast & Huber 2001). Even then, it seems to be the hypothalamic pathway that regulates this, rather than nutrition itself (Kalra & Kalra 1996; Schwartz & Seeley 1997). Indeed, experimental studies of domestic stock have shown that stocking rate (in effect, social group size) is responsible for this, independently of any effect due to food availability or nutrition (von Borell et al. 2007; Einarsson et al. 2008; Dobson et al. 2012; Clarke 2014). In short, it seems that the same endorphin/HPA pathway is involved in both social and

ecological routes, perhaps explaining why it can be difficult to distinguish between their respective effects. In short, it seems that living in large groups can adversely affect female fertility irrespective of how rich the foraging conditions may be.

For species that live in loose associations (herds), these costs can easily be defused by leaving the group and joining a smaller one – as is widely exemplified in non-primate mammals. However, for species like primates that live in bonded social groups (Dunbar & Shultz 2010; Shultz & Dunbar 2010; Massen et al. 2010), individuals cannot easily leave one group to join another because entry by strangers is often aggressively resisted (Dunbar 1984; Kahlenberg et al. 2008). Since predation risk militates against leaving groups to forage alone (Dunbar et al. 2009), the only way a group can lose members is to fission into two independent groups large enough to survive on their own. Fission has been documented in many primate species (e.g. Dunbar 1988; Ménard & Vallet 1993; Henzi et al. 1997; van Horn et al. 2007). An important constraint is that if minimum group size is set by the local predation risk (Dunbar et al. 2009; Bettridge & Dunbar 2012), groups need to be at least twice this size at fission in order to allow both daughter groups to be above the specified minimum (see also Dunbar & Sosis 2017).

We use a comprehensive dataset of baboon group sizes to investigate the structural patterns that these exhibit, and explore likely reasons for the patterns in terms of predation risk and fertility. We take baboons to refer to the large terrestrial primates of Africa ('baboons' *sensu* Jolly 2007). For present purposes, we include the genera *Papio* (the baboons of conventional usage) and *Theropithecus* (the gelada). We exclude *Mandrillus* (drills and mandrills) because their groups are still poorly understood and have yet to be reliably censused. There are some grounds for considering *Lophocebus* and *Rungwecebus* as allies of the baboons, but as these are

arboreal and hence likely to be subject to very different selection pressures as a result (arboreal habitats are typically much less predator risky), we exclude them as well.

We ask three questions: (1) Is there a typical or natural size for baboon groups? (2) Why do baboons have the range of group sizes that they do? and (3) How can we explain the structural differences that distinguish some species (specifically, hamadryas and gelada with their multilevel harem-based social systems) from others (the remaining four species of *Papio* which lack a harem structure).

## Methods

We comprehensively searched the literature for census data on baboon group sizes, providing such censuses were part of a systematic attempt to count the size and composition of individual baboon groups at a given location. We take group (or troop) size to be that defined by the field worker. For *Papio anubis*, *P. cynocephalus* and *P. ursinus*, the group is fairly obvious, since animals forage and sleep together in stable social groups that maintain a degree of demographic coherence and stability over time as well as spatial separation from neighbouring groups. Exactly what counts as a group in *Papio papio* has been the subject of some debate because of this species' rather more flexible form of sociality, but all field workers on this species agree on the existence of some form of stable social group, at least as defined by animals that share a common range area (Dunbar & Nathan 1972; Boese 1975; Sharman 1981; Patzelt et al. 2011). For *P. hamadryas* and *Theropithecus gelada*, we equate the social group with the band (a collection of single male reproductive units, or harems, that share a common home range and frequently forage together: Kummer 1968; Mac Carron & Dunbar 2016). In all three latter cases, we use the group (or band) as defined by the fieldworker concerned. However, in order to ensure that we were

comparing like with like, we excluded publications (e.g. Zinner et al. 2001) which provided only mean group sizes for a location or did not provide clear evidence for differentiating between grouping levels in the case of those species (*P. hamadryas* and *T. gelada*) which have multilevel societies.

In populations that were subject to longterm study with repeated censuses of the same social groups, we counted a census as being new only providing it had been carried out at least five years after the previous census of that group. In either case, we always used the original (i.e. earliest) census and at most one later census. This yielded a total of 444 groups across 53 study sites in 13 countries for five species of *Papio* and the one extant species of *Theropithecus*. There are insufficient data available for *P. kindae*, which has only recently been elevated to species status (Zinner et al. 2013) and has not been well studied in the field. The data are given in Table S1.

We first determined whether the distribution of group sizes is unimodal. If the distribution is not normal, our task is to find the most appropriate distribution that does describe the data. We used maximum-likelihood methods (Clauset et al. 2009) to fit the following common distributions: power law, truncated power law, geometric, negative binomial, exponential, stretched exponential, normal, lognormal, and a compound Poisson distribution. The first eight of these assume that the data are non-normal (i.e. skewed) distribution with a single definable mode. The last assumes that the observed distribution is in fact the product of several separate distributions, each with their own modes, that have been pooled together. That might occur because each species has a single modal (or typical) value, but the values for the various species differ significantly. However, more interestingly, such a pattern might occur when a group's size oscillates within sets of defined limits, with the particular limits being set



by some key aspect of the animals' ecology; in these cases, individual species may be found in a wide range of group sizes (or group size "types").

As the dataset consists of discrete integers, we used the discrete approach as described by Clauset et al. (2009). We numerically maximised the log-likelihood of each candidate distribution to obtain its parameter estimates, using the *optimize* module of Python's *scipy* (v0.17.1) library, and identified the most likely model using the Akaike Information Criterion (AIC). In the case of the compound Poisson, we treated the data as being made up of 1 to  $n$  Poisson distributions; the AIC for each  $n$  is calculated successively, stopping when a local minimum is reached to give the optimal  $n$ . This is the only distribution tested that is multimodal; the rest have a single peak and, except for the normal distribution, all are right skewed.

Because models with more parameters are always more likely to fit the data, we applied a clustering algorithm to see if a different approach gives the same result. Since most clustering algorithms are meant for a high number of dimensions (Jain 2010), we used the Jenks natural breaks algorithm as this is more appropriate for data with only one dimension (Jenks 1967). Jenks is very similar to  $k$ -means clustering in one dimension and works by minimising the variance within different numbers of clusters. In order to choose the optimal number of clusters, we calculated a goodness of fit for each number of clusters. Since a goodness of fit of 1.0 can only be attained when there is no within-class variation (typically when the number of clusters is the same as the sample size), we follow Coulson (1987) and take a value of 0.85 as the threshold.

Female fertility rates for 15 individual baboon troops are taken from Hill et al. (2000), with additional data from more recent studies for one group each for *P. anubis* (Higham et al. 2009) and *P. ursinus* (Cheney et al. 2004), two groups for *P.*

*hamadryas* (Swedell & Saunders 2006; Chowdhury et al. 2015), and three bands for *T. gelada* (from Ohsawa & Dunbar 1984). In addition, we give two population means for *P. papio* (Boese 1975; Sharman 1981) based on the number of immatures (prepuberty individuals, less than ~ 4 years of age) in a group. In plotting fertility rate against group size, we use the mean size of the foraging group in the case of the multilevel hamadryas and gelada since this is the social context in which animals spend most of their time and it is this that affects female fertility. For hamadryas, we identify this as the band; for gelada, we identify this as the herd. Mean population group size, climatic and forest cover data for these habitats are from Bettridge et al. (2010). The data are provided in Table S2.

## Results

### *Group size*

The distribution of baboon group sizes is highly skewed, with a mean of  $48.5 \pm 43.4$ SD and a range of 3-262 (Fig. 1). Analysis of variance indicates that group sizes vary significantly across the six species (Fig. 2:  $F_{5,438}=32.25$ ,  $p < 0.0001$ ). Scheffé post hoc tests suggest that the data fall into two clusters that differ significantly from each other ( $p < 0.001$ ). These are: (1) *Papio anubis* (mean group size =  $40.3 \pm 26.4$ ,  $N=104$ ), *P. cynocephalus* (mean group size =  $51.7 \pm 34.5$ ,  $N=105$ ) and *P. ursinus* (mean group size =  $30.4 \pm 21.9$ ,  $N=166$ ) and (2) *P. papio* (mean group size =  $91.6 \pm 69.4$ ,  $N=34$ ), *P. hamadryas* (mean group size =  $93.5 \pm 62.4$ ,  $N=13$ ) and *Theropithecus gelada* (mean =  $115.7 \pm 71.7$ ,  $N=22$ ). For convenience, we label the first set as the ‘woodland’ species, a term that has no taxonomic implications but refers to the fact that they mostly occupy savannah woodland habitats that are rather different to the kinds of habitats occupied by the hamadryas and gelada.

Applying maximum likelihood estimation to the raw data in Fig. 1 indicates that the distribution is most likely made up of 4 Poisson distributions (Table 1) with means 19.1, 42.6, 83.3 and 189.4. Excluding gelada gives virtually the same results (means at 18.7, 41.0, 79.1 and 180.3). The Jenks algorithm also suggests that four clusters is optimal for all *Papio* combined (means of 19.8, 45.6, 85.4 and 184.4), but opts for just three clusters when gelada are included (means 27.1, 77.0 and 190.1). All four series have a mean scaling ratio of ~2.1 (2.7 for the last case), suggesting a fractal pattern indicative of binary fission.

We also analysed each species separately: Jenks identifies three or four as the optimal number of clusters for all six species, with cluster means that are all close to those found for the sample as a whole and scaling ratios close to 2 (Table 2). More importantly, with the exception of the largest cluster (~160) for *Papio anubis* and the smallest cluster (~20) for *P. papio*, *P. hamadryas* and *Theropithecus gelada*, all clusters are present in all species.

We suggest that these cluster values make up a set of linear oscillators, with attractors at ~20 and ~40, ~40 and ~80, and ~80 and ~160 respectively. In effect, group size oscillates between the limits set by a given oscillator (i.e. 20/40, 40/80 or 80/160). Within an oscillator, natural growth rates cause groups to increase in size until they fission at the upper value to return to the lower value, and begin the cycle all over again.

It seems that most populations have a characteristic group size that sits comfortably within one of these oscillators. Analysis of the distribution of group sizes for the 27 sites with at least five censused groups indicates that only five are not (unimodal) normally distributed. In these five cases (Amboseli NP, Gilgil, Mt Assirik, Nairobi NP and Giants Castle), the bimodality is created by a small number of very

large ( $N > 100$ ) outliers, with the bulk of the groups normally distributed within one or other of the two smaller oscillators. This may reflect the fact that these sites are typically associated with a mosaic of habitat types. The rest all have a group size distribution that falls mainly into one of the oscillators. Fig. 3 plots the proportion of groups in the smallest (20/40) oscillator in each of these populations. The data exhibit a clear bimodal pattern: about half the populations have all or most their groups in the 20/40 oscillator and half have all or most of their groups within the 40/80 or 80/120 oscillators. There is a conspicuous absence of groups with an even split.

This raises three questions: (1) Why are there distinct oscillators rather than a continuous series of optimal values tracking some environmental variable like rainfall? (2) Why do different populations seem to opt for different oscillators? (3) What are the structural consequences of the oscillators? We suggest that the trade off between fertility and predation risk is the key to answering these questions.

#### *Optimising group size in different habitats*

Fig. 4 plots population mean group size as a function of predator density and tree cover (the two main factors that influence predation risk for baboons: Cowlshaw 1997a,b). Predator density is the sum of the densities of the baboons' two main predators (leopard and lion: Cowlshaw 1994), each predicted from species-specific climate envelope models using data from 59 locations distributed across sub-Saharan Africa (Bettridge et al. 2010). Tree cover (percent of ground covered by tree canopy) is estimated from satellite imagery for the *Papio* populations (see Bettridge et al. 2010) and from ground transects for the gelada populations (Iwamoto & Dunbar 1983). Tree cover is significantly lower in hamadryas and gelada habitats than the habitats of the other *Papio* species (Fig. S1). Essentially, group size is low when there

are plenty of trees available as refuges, but, in habitats with few trees, groups are large (in some cases, very large) *if* predator density is high. A general linear model indicates that, while there is no main effect for predation in the predicted direction ( $F_{1,20}=0.75$ ,  $p=0.199$ ), mean group size is significantly higher in less forested habitats ( $F_{1,20}=3.77$ ,  $p=0.033$ ) and there is a significant forest\*predator interaction ( $F_{1,20}=3.52$ ,  $p=0.038$ ). (We here test a set of explicit directional hypotheses based on Cowlishaw [1997a,b], so all statistical tests are necessarily 1-tailed.)

To further illustrate this, Fig. 5 plots mean population group size against a composite index of predation risk. The predation risk index is the sum of the standardised deviate of predator density and the standardised deviate of habitat openness (defined as 100 minus percent tree cover). There is a significant relationship between mean group size and the composite index of predation risk ( $r=0.506$ ,  $N=24$ ,  $p=0.006$  1-tailed). In other words, resort to large group sizes (and hence the higher oscillators) appears to be driven by high predation risk.

Finally, we use Bettridge et al.'s (2010) baboon time budget model to calculate minimum and maximum ecologically tolerable group sizes as a function of climatic conditions. Minimum group size is a simple function of the density of baboons' two main predators (leopard and lion) (Bettridge et al. 2010). Maximum group size is determined by first calculating the amount of time that animals need to devote to feeding, moving and resting using the equations given by Bettridge et al. (2010) that relate each of these to climate variables; we then subtract the sum of these from 100% (i.e. all daytime) to give the maximum amount of time available for social grooming; finally, we use the regression equation relating required grooming time to group size in primates (Dunbar 1991; Lehmann et al. 2007a) to determine the largest

group size that the animals' time budget could support at that locality (for details, see Dunbar et al. 2009; Bettridge et al. 2010).

To simplify the presentation of these results, we transformed the eight climate variables used in the model into functions of a single variable (mean annual rainfall) (using the data given in Bettridge et al. 2010; linear regressions:  $0.366 \leq r \leq 0.892$ ,  $p \leq 0.078$  2-tailed) and use these to plot minimum and maximum group sizes across the full range of rainfall regimes (0-2000 mm per annum) found in Africa (Fig. 6). Rainfall is a reliable index of forest cover (tree density) in Africa. Minimum group size declines slowly as rainfall increases (i.e. as tree density increases), with a mean value of  $\sim 20.7$  (range 18.6-25.9). Maximum tolerable group size increases with rainfall, rising from a base of  $\sim 55$  to a maximum of  $\sim 110$  in the wettest (i.e. richest) habitats. Maximum group size sets an absolute upper limit and groups cannot exceed this value without paying a price in terms of group cohesion or energy intake because they will not be able to balance their time (and hence energy/nutrient) budget. The space between the minimum and maximum lines in Fig. 6 represents the genus's realisable niche space: groups will be in ecological balance only if they lie between the two lines (Dunbar et al. 2009). Although groups can stray outside these limits, they should be able to do so only to a limited extent and, usually, only for a limited period of time.

Notice that the lines on Fig. 6 represent the two conventional components of fitness (fertility and survivorship). In any given habitat, animals will reduce predation risk, and hence maximise survivorship (albeit at the expense of fertility), by living in the largest groups they can (i.e. closest to the upper dashed line); conversely, they will maximise fertility (at the expense of increased predation risk, and hence reduced survivorship) by living in the smallest groups they can (i.e. closest to the lower solid

line). Where they choose to position themselves in this state space should depend on how intrusive predation risk is for them.

The mean group sizes for 19 populations of *Papio* for which detailed climate data are available are plotted onto Fig. 6 as a function of their actual local rainfall regime. All except one of the datapoints lie within or close to the minimum and maximum lines. The exception (Laikipia, Kenya) which lies just outside the upper limit is a site with a particularly low density of tree cover (10%) and a high predicted density of predators (and, within the last century, an unusually high actual density of leopard). More importantly, there appears to be a phase shift in group size at ~1000mm rainfall: populations seem to switch from maximising group size in dry habitats to minimising group size in wet habitats. This likely reflects the availability of trees that can act as refuges when a group encounters predators during foraging: the heavy sigmoid line plots the percentage of tree cover as a function of rainfall. The switch point seems to correspond to a phase transition in the degree of forest cover, with a value of ~30% tree cover (i.e. quite heavily wooded habitats) demarcating this transition point. In more open habitats, baboons rely on maximising group size to deter predators (at the expense of reduced birth rates), whereas more wooded habitats allow them to live in smaller groups so as to maximise fertility.

### *Fertility*

Next, we ask how fertility is affected by group size. Fig. 7 plots mean birth rate against group size for 25 baboon study sites (including three for gelada). The woodland baboon data are clearly best explained by a quadratic regression ( $b=0.149+0.014N-0.00016N^2$ , where  $b$  = annual birth rate per female and  $N$  = group size;  $F_{2,12}=6.82$ ,  $r^2=0.532$ ,  $p=0.011$ ; linear:  $F_{1,13}=0.30$ ,  $r^2=0.022$ ,  $p=0.594$ ). The

quadratic relationship holds individually across all three woodland species (Dunbar et al. 2018a), and when the Guinea baboon datapoints are included ( $F_{2,14}=5.38$ ,  $r^2=0.434$ ,  $p=0.019$ ). It seems that fertility increases monotonically with group size to a maximum of about 0.54 births/year at a group size of ~55, and then declines again at a similar rate.

Hill et al. (2000) found that *Papio* birth rates are also independently determined by mean ambient temperature (an index of habitat quality: Dunbar et al. 2009). However, for the woodland baboons at least, the results are exactly the same if we plot residuals from a regression of fertility on rainfall against group size (Fig. S2), indicating that, irrespective of the effect that habitat quality has on birth rates, birth rates are independently a quadratic function of group size.

In contrast, the hamadryas and gelada datapoints lie well outside the 95% confidence intervals for the woodland species. Their data also fit a quadratic regression ( $F_{2,8}=10.66$ ,  $r^2=0.727$ ,  $p=0.006$ ; linear:  $F_{1,19}=1.09$ ,  $r^2=0.108$ ,  $p=0.323$ ) that is very similar in form, but with a significantly lower intercept (meaning that the graph is displaced to the right compared to that for the woodland baboons). For the hamadryas and gelada, a quadratic relationship gives a maximum birth rate at groups of  $N \approx 125$  (i.e. slightly more than twice that for the woodland species). This result holds even when we use the maximum group sizes for hamadryas (sleeping troops) and gelada (the band) (Fig. S3).

Fig. 7 indicates that no population has a birth rate below 0.3 per annum. With a ~13-year reproductive lifespan, a minimum fertility of ~0.15 births per year is required for replacement (i.e. two offspring at the end of a lifetime). Since survivorship to puberty averages ~50% in wild baboons (Altmann et al. 1977; Sigg et al. 1982), this would require a minimum birth rate of 0.3 for demographic stationarity



(i.e. for a population to avoid extinction). This being so, the regression equation for the woodland baboon populations would set an upper limit to group size at 95 for demographic viability. This value includes 92.4% of all baboon groups in the sample in Fig. 1 (or 93.1% of the groups for the three woodland species: Table S1). Note that this is only just above the mean group size (91.6) for Guinea baboons, suggesting that they are on the edge of viability. Groups larger than this will not be reproducing fast enough to compensate for natural mortality, and will therefore oscillate perpetually around this value until they fission. In contrast, the fertility data for hamadryas and gelada predict a limiting group size of ~180 (2.2 times the equivalent for the other species), just above the uppermost attractor in Fig. 1.

The quadratic form of this equation also implies a minimum limit on group size: in woodland species, groups smaller than ~15 would have birth rates below the limit for demographic viability, and so would be in terminal decline. Only 8.6% of all groups in the savannah sample are smaller than this. Note that baboons thus have a lower limit on group size that is substantially larger than the size of groups characteristic of most primate species (~60% of primate species have a mean group size of <15 individuals: Dunbar et al., 2018b). In contrast, hamadryas and gelada would have a lower limit on group size of 38. The smallest hamadryas band recorded in the present sample is in fact 38 (Table S1), while the mean size for gelada teams (the natural grouping for this species, and the set of harems that stay together most closely) is 34 (Mac Carron & Dunbar 2016).

## Discussion

The regular patterning in the distribution of baboon group sizes suggests a fractal sequence with attractors at ~20, ~40, ~80 and ~160 that are particularly

common. Since these values have a scaling ratio of  $\sim 2.0$ , they are likely to be the product of a binary fission process, as also seems to be the case in the gelada (Mac Carron & Dunbar 2016). At the same time, very small groups of the size common in many other primates ( $<15$  members) are rare (Fig. 1). In fact, 60% of groups with  $N < 15$  in the baboon sample were from South African *Papio ursinus* populations living in high latitude, high altitude (i.e. poor quality, thermally challenging) habitats with extremely low predator densities and environmental conditions that impose severe limits on group size. There are no census data available for *Papio kindae*, but the count of 83 for one group given by Weyher et al. (2014) is within the range for the middle oscillator and similar to the group sizes reported from *Papio cynocephalus* populations. Since minimum group size is determined by female body mass in addition to predation risk (smaller species live in bigger groups: Bettridge & Dunbar 2012), we would expect *P. kindae* to live in larger groups than any of the other species in comparable habitats.

If groups of  $\sim 20$  are the minimum viable size, then the corresponding minimum size at fission will need to be around 40-45 – or above if groups do not fission into equal halves. While predation risk and fission processes seem to provide a natural explanation for a fractal pattern of group sizes, they do not of themselves explain why fission should typically occur at the group sizes where seems to, especially as these are well below the limiting group size for baboons set by their carrying capacity in most habitats (Bettridge et al. 2010).

The impact of social competition on fertility is clearly an issue for group-living primates, as it is for all social mammals. The fact that, in both monkeys and humans, the fertility decline can be attributed directly to the number of females in the group rather than to the number of males or total group size (Dunbar 1980; Hill et al.

2000; Ji et al. 2013), and does so even in captivity where food is abundant (Garcia et al. 2006), points to the importance of a social, rather than ecological, explanation – even though competition for food may sometimes provide the context for this. These costs appear to be so strong that they effectively limit group size to ~15 individuals in most primates (Dunbar 2018). Cercopithecine primates seem to have evolved female coalitions as a mechanism for mitigating these costs in order to make larger groups possible (Dunbar 2012, 2018; Dunbar & Shultz 2017). Female baboons with larger grooming-based coalitions experience less harassment (Dunbar 1980, 2018), have lower cortisol titres (Crockford et al. 2008; Wittig et al. 2008), produce more offspring and live longer (Silk et al. 2003, 2009, 2010).

We have suggested that woodland baboon species are constrained by the fertility curve in Fig. 7 to groups between ~20 and ~80 in size, and that this gives rise to a pair of linear oscillators (20/40 and 40/80). We have shown elsewhere (Dunbar et al. 2018b) that the two lower oscillators (20-40 and 40-80) are an evolutionary stable strategy (ESS) for the woodland baboon species. The estimated lifetime reproductive outputs of the average female in the two oscillators, given the fertility rates in Fig. 7, are equal only when the phase shift between them occurs at a group size of ~40. Phase transitions set either side of this value will result in one or other of the oscillators being disproportionately favoured: if the switch over occurs at smaller group sizes (groups in the range 25-35), then females in the larger oscillator do significantly better, while the reverse is true if the switch over occurs at larger group sizes (45-75). This seems to be due to the fact that a phase transition at the group size that maximises fertility results in females doing equally well either way, the difference simply being whether they experience maximum fertility early or late in their reproductive lives. In other words, these two oscillators seem to represent an optimal

partition for females trying to maximise their fitness under different predation risk conditions. Although predation risk might favour a quantitative response, the fertility costs result in a qualitative switch between states (i.e. oscillators).

That the upper values in each case are fission points is indicated by evidence that *Papio ursinus* groups living in a low predation risk habitat in South Africa typically fission at a size of ~32 (for a mean population group size of 22.4, N=61) whereas *P. cynocephalus* groups living in a high predation risk habitat in East Africa do so at ~65 (mean population group size 50.7, N=51) (Henzi et al. 1997). These are likely to be facultative responses to environmental conditions, so populations can be expected to switch between these oscillators as environmental circumstances change. Some evidence for this is provided by the fact that, over a period of four decades, the *Papio anubis* population at Gombe switched from a 20/40 range to a 40/80 range and, subsequently, back again (Tony Collins, pers. comm.), though the circumstances that prevailed on them to do so remain unclear.

We are left with the question of why hamadryas and gelada have opted for an oscillator that lies outside this range. Part of the answer may lie in the fact that these two species live in much more open (hence even more predator risky) habitats than those typically occupied by other baboons (Fig. 5). This does not necessarily mean that they have higher predator densities, but it does mean that the availability of large trees to act as refuges is very limited. It is the virtual absence of large trees that obliges hamadryas to congregate at night on rocky outcrops and gelada to seek refuge on sheer cliff faces.

The problem for both these two species is that they can only increase group size significantly to compensate for the higher predation risk providing they can find some way of circumventing the fertility trap. To illustrate the magnitude of this trap

we can use the regression equation for fertility from Fig. 7 to model the change in group size over time for groups with initial sizes of 15, 17, 20 and 25, subject to an annual mortality rate that varies randomly across a normal distribution with a mean of 10% and a range of 4-16% (based on data from 3 long term study sites: Moremi, Amboseli and Gombe; Cheney et al. 2004; Bronikowski et al. 2002). Reproductive females are assumed to constitute ~30% of the group, as is typical of both *Papio* baboons in particular (Fig. S4) and primates in general (Dunbar et al. 2018a). Note that the point of this model is simply to observe the consequences of the particular demographic configuration implied by the fertility rates in Fig. 3.

Fig. 8 plots the results. Groups whose initial size is <17 animals will always go extinct (grey shaded region) because their fertility rates are too low to offset mortality. Groups with an initial size >17 grow slowly for a number of years and then accelerate until they reach an asymptotic value of ~100, where they will stay indefinitely. When group size exceeds this value, fertility drops and excess mortality reduces group size; this allows fertility to increase, which in turn allows the group to grow again until fertility once more drops below mortality. Left to their own devices, populations will have natural limits at ~20 and ~100, and groups will often be stuck at these values for some considerable time (in the first case, until random fluctuations in mortality and female cohort size allow them to break out of the lower cycle; in the second case, until fission radically reduces group size).

The contrast between hamadryas and gelada and the woodland species (including the Guinea baboon) is striking. The decline in fertility at group sizes above 50 is sufficiently steep that it will place groups of >100, as occur regularly in hamadryas and gelada, under significant demographic pressure with birth rates below the level for demographic replacement. Fig. 8 suggests that, all else equal, it should be

extremely difficult, if not impossible, for these two species to increase group size to the levels that they have been able to do. Yet they have both clearly managed to do so. They have somehow been able to shift their fertility schedule to the right such that they can live in much larger groups (Fig. 7).

Hamadryas live in a poor quality semi-desert habitat, with very few large trees to act as refuges (even along watercourses) and predator densities similar to those faced by woodland baboon populations. In a habitat virtually devoid of large trees, they are obliged to congregate at night in very large herds (typically several bands) on the few rocky outcrops large enough to provide safe night time refuges (Kummer 1968; Sigg & Stolba 1981; Schrier & Swedell 2012b). That predation is a concern for them is indicated by the fact that, during the day, hamadryas bands (which normally disperse over a wide area when foraging) will bunch defensively when predators are heard or sighted (Schrier & Swedell 2012a), just as savannah baboons do (Altmann & Altmann 1970).

Although the gelada live in a cool, high altitude habitat with rich grassy swards that allow very large herds to congregate (at least during the wet season: Mac Carron & Dunbar 2016), they also face a significant level of predation risk (historically from leopard, but more recently hyaena in large numbers) in a completely treeless habitat that can be nutritionally challenging for them during the dry season (Dunbar 1984; Mac Carron & Dunbar 2016). As with the hamadryas, large groups remain a crucial adaptation for minimising predation risk if gelada are to forage on the plateau tops away from the safety provided by the cliff faces of the gorge systems. Where gelada remain on the cliff faces, they have much smaller bands (typically 40-70 animals) and individual harems often forage on their own (Dunbar & Dunbar 1975; Dunbar 1984; Dunbar & Mac Carron 2016).

The dietary adaptations of these two species (Dunbar & Boese 1991) and the dynamics of their social relationships (Dunbar 1983b) are radically different and unlikely to be the cause of this substructuring. The only aspect of behaviour or ecology that is common to the two species is the subdivision of groups (bands) into harems. If so, this provides a principled explanation for why hamadryas and gelada have such different social systems to the other baboons (and the other large-bodied cercopithecines like the mangabeys and macaques). It is perhaps worth noting that when habitat conditions dictate foraging groups significantly smaller than band size in gelada, the harems are sufficiently independent to be able to separate out and forage alone (e.g. Bole valley: Dunbar & Dunbar 1975; Bale Mountains: Mori et al. 1999).

One plausible suggestion, then, is that the hamadryas and gelada have achieved this transition by exploiting a form of alliance-based substructuring (i.e. harems) so as to buffer females against the stresses of living in very large groups. It may be no coincidence that both these species have adopted a harem-based form of sociality in which groups of closely related females (Dunbar 1984; Swedell 2002; Städele et al. 2016) are attached to a male rather than dispersing in small, unstable foraging parties, as happens in chimpanzees (Lehmann et al. 2007b) and spider monkeys (Korstjens et al. 2006) under similar circumstances. In both hamadryas and gelada, the substructuring is reinforced (more so in the first case, less so in the second) by forms of male herding behaviour that are not observed in the other species, but functionally the consequences are that groups of (usually related) females associate with a male capable of providing additional support during altercations without creating the fertility problems associated with associating with more females. In this respect, they are rather similar to gorilla groups, where the male also provides what amounts to a bodyguard service (Harcourt & Greenberg 2001).

563

564

565           But why should such substructuring take the form of harems associated with a  
566 single breeding male (and sometimes an associated follower male)? One possible  
567 explanation might be that the size of coalitions is limited by matriline size, and this  
568 itself may set a limit on the point at which fertility is maximised by woodland  
569 baboons in Fig. 7. Matriline size is likely to be limited by lifehistory processes, since  
570 matriline typically fission once their matriarch dies. If this sets an upper limit to  
571 matriline size, then their ability to buffer females against the stresses of group-living  
572 will set a corresponding limit to group size. Some evidence to suggest this is given by  
573 the fact that, across cercopithecine primates, mean grooming clique size (commonly a  
574 matrilineal grouping) correlates with species mean group size (Kudo & Dunbar 2001;  
575 Lehmann & Dunbar 2009b). Perhaps the only way of increasing coalition size beyond  
576 this may be to add a male who can act as a ‘hired gun’ to protect the females from  
577 harassment, but who doesn’t himself compete with the females (the ‘bodyguard  
578 hypothesis’: Mesnick 1997; Wilson & Mesnick 1997; Harcourt & Greenberg 2001).  
579 The effectiveness of this is evident in gelada. Conflicts between neighbouring harems  
580 are usually initiated by one, occasionally two, females; if the conflict escalates, more  
581 females will become involved, until eventually the harem males are drawn into the  
582 dispute in defence of their females (Dunbar 1983a, 2018).

583           In many ways, Guinea baboons (*Papio papio*) face similar problems: the  
584 density and height of the ground level vegetation throughout most of their range in  
585 West Africa, combined with a relatively flat landscape and a low overall density of  
586 large trees away from the major rivers, makes their habitats particularly predator-  
587 risky. The density and height of the ground-level vegetation, for example, means that



Guinea baboons have little advance warning of the approach of cursorial predators, thus making them especially vulnerable (pers. obs.; see also Cowlshaw 1997b). The Guinea baboon social system is not well understood, although most authors agree that some form of loose multi-level grouping seems to be involved. Patzelt et al. (2011) provide some evidence (albeit based only on association patterns between individual males) that this species has a three tier social system that consists of parties, gangs and communities. They identify the gang (defined as the set of animals that share the same home range) of around ~60 animals (at their study site) as the equivalent of the baboon troop (and hamadryas band), with the party being a group of females loosely associated with a male. The *Papio* time budget model (Bettridge et al. 2010) gives a maximum ecologically tolerable group size of 88.5 for baboons in the habitats occupied by Guinea baboons in southeast Senegal – almost exactly the observed mean group size for the censused Guinea baboon populations from this area (Fig. 2). This suggests that this species is attempting to maximise its group sizes, presumably to cope with high predation risk, but, in contrast to the hamadryas, does so at the expense of reduced fertility and social coherence because it has not managed to evolve the behavioural and cognitive mechanisms (e.g. the male herding behaviour observed in both hamadryas and gelada) that would allow it to substructure these groups effectively. This might explain their seemingly somewhat chaotic social structure.

These analyses provide principled answers to the questions we posed in the light of the fractal distribution of baboon group sizes, namely why there are distinct oscillators rather than a series of optimal values, why different populations prefer different oscillators and what the structural consequences of the oscillators are. It seems that the oscillators represent an evolutionarily stable strategy set driven by local predation risk. While baboon sociality can cope with the two lower oscillators without

significant stress, the upper oscillator (characteristic of hamadryas and gelada) is only stable if the animals can introduce structural adaptations that allow the fertility schedule to be shifted sufficiently to the right. This seems to have involved formal substructuring that has involved an intensification of the natural matrilineal coalitions characteristic of baboons and other cercopithecines and then attaching these subgroups to a male who acts as a 'hired gun'. At least in the case of the hamadryas, this seems to have required some degree of genetic underpinning in terms of male herding behaviour (Nagel 1973; Bergman et al. 2008), a pattern that seems crucial in enforcing their harem-based system (given that both anubis and hamadryas females seem able to adapt to either social system: Kummer 1968). However, even gelada males herd their females away from rivals (Dunbar 1984), although they do not do so as effectively as hamadryas males do.

There are several predictions that follow from this model of baboon demography. First, the oscillator should change when baboons migrate into a more, or less, predator risky habitat, or there are changes in, for example, tree density due to deforestation or longterm climatic change influencing habitat structure and tree composition (as has happened at Amboseli: Altmann et al. 1985). Second, individual groups should show cyclic changes in average female fertility over time, following the patterns in Fig. 7. These changes should be upwards (followed by rapid collapse) for baboon groups in the 20-40 oscillator, and downwards (followed by rapid improvement) in populations in the 40-80 oscillator.

## 638 **Acknowledgments**

639 This research has been funded by a European Research Council Advanced  
640 Investigator grant (#295663) to RD. We thank Cole Robertson for collating the *Papio*  
641 database.

642

643

644

# References

- Abbott, D.H., Hodges, J.K. & George, L.M. (1988). Social status controls LH secretion and ovulation in female marmoset monkeys (*Callithrix jacchus*). *Journal of Endocrinology* 117: 329-339.
- Abbott, D. H., McNeilly, A. S., Lunn, S. F., Hulme, M. J. & Burden, F. J. (1981). Inhibition of ovarian function in subordinate female marmoset monkeys (*Callithrix jacchus jacchus*). *Journal of Reproduction and Fertility* 63: 335-345.
- Abbott, D.H., Keverne, E.B., Moore, G.F. & Yodyingvad, U. (1986). Social suppression of reproduction in subordinate talapoin monkeys, *Miopithecus talapoin*. In: Else, J. & Lee, P.C. (eds.) *Primate Ontogeny*, pp. 329-341. Cambridge: Cambridge University Press.
- Adamczak, V. & Dunbar, R.I.M. (2008). Variation in the mating system of oribis and their ecological determinants. *African Journal of Ecology* 45: 197-206.
- Altmann, J. & Alberts, S.C. (2003). Variability in reproductive success viewed from a life-history perspective in baboons. *American Journal of Human Biology* 15: 401-409.
- Altmann, J., Hausfater, G. & Altmann, S.A. (1985). Demography of Amboseli baboons, 1963-1983. *American Journal of Primatology* 8: 113-125.
- Altmann, S.A. & Altmann, J. (1970). *Baboon Ecology*. Basel: Karger.
- Altnann, S.A. & Altmann, J. (1979). Demographic constraints on behavior and social organization. In: Bernstein, I.S. & Smith, E.O. (eds) *Primate Ecology and Human Origins*, pp. 47-63. New York: Garland.
- Altmann, J., Altmann, S.A., Hausfater, G. & McCuskey, S.A. (1977). Life history of yellow baboons: physical development, reproductive parameters, and infant

670 mortality. *Primates* 18: 315-330.

671 An, Y., Sun, Z., Li, L., Zhang, Y. & Ji, H. (2013). Relationship between  
672 psychological stress and reproductive outcome in women undergoing in vitro  
673 fertilization treatment: psychological and neurohormonal assessment. *Journal*  
674 *of Assisted Reproduction and Genetics* 30: 35-41.

675 Bean, L.L., & Mineau, G.P. (1986). The polygyny-fertility hypothesis: a reevaluation,  
676 *Population Studies* 40: 67-81.

677 Bergman, T.J., Phillips-Conroy, J.E., & Jolly, C.J. (2008). Behavioral variation and  
678 reproductive success of male baboons (*Papio anubis*×*Papio hamadryas*) in a  
679 hybrid social group. *American Journal of Primatology* 70: 136-147.

680 Bettridge, C. & Dunbar, R.I.M. (2012). Predation as a determinant of minimum group  
681 size in baboons. *Folia Primatologica* 83: 332-352.

682 Bettridge, C., Lehmann, J. & Dunbar, R.I.M. (2010). Trade-offs between time,  
683 predation risk and life history, and their implications for biogeography: a  
684 systems modelling approach with a primate case study. *Ecological Modelling*  
685 **221**, 777-790.

686 Boese, G.K. (1975). Social behaviour and ecological considerations of West African  
687 baboons (*Papio papio*). In: *Socioecology and Psychology of Primates* (ed.  
688 R.H. Tuttle) pp. 205-230. The Hague: Mouton.

689 von Borell, E., Dobson, H. & Prunier, A. (2007). Stress, behaviour and reproductive  
690 performance in female cattle and pigs. *Hormones and Behavior* 52: 130-138.

691 Borgerhoff Mulder, M. (1989). Marital status and reproductive performance in  
692 Kipsigis women: Re-evaluating the polygyny-fertility hypothesis. *Population*  
693 *Studies* 43: 285-304.

694 Borries, C., Larney, L., Lu, A., Ossi, K. & Koenig, A. (2008). Costs of group size:

695 lower developmental and reproductive rates in larger groups of leaf monkeys.  
696 *Behavioral Ecology* 19: 1186-1191.

697 Bowman, L.A., Dilley, S. & Keverne, E.B. (1978). Suppression of oestrogen-induced  
698 LH surges by social subordination in talapoin monkeys. *Nature* 275: 56-58.

699 Bronikowski, A.M., Alberts, S.C., Altmann, J., Packer, C., Carey, K.D. & Tatar, M.  
700 (2002). The aging baboon: comparative demography in a non-human primate.  
701 *Proceedings of the National Academy of Sciences, USA* 99: 9591–9595.

702 Cameron EZ, Setsaas TH, Linklater WL. 2009 Social bonds between unrelated  
703 females increase reproductive success in feral horses. *Proceedings of the*  
704 *National Academy of Sciences, USA* 106, 13 850–13 853.

705 Cheney, D.L., Seyfarth, R.M., Fischer, J., Beehner, J., Bergman, T., Johnson, S.E.,  
706 Kitchen, D.M., Palombit, R., Rendall, D. & Silk, J.B. (2004). Factors affecting  
707 reproduction and mortality among baboons in the Okavango Delta, Botswana.  
708 *International Journal of Primatology* 25: 401-428.

709 Chojnacka, H. (1980), Polygyny and the rate of population growth. *Population*  
710 *Studies* 34: 91-107.

711 Chowdhury, S., Pines, M., Saunders, J. & Swedell, L. (2015). The adaptive value of  
712 secondary males in the polygynous multi-level society of haramyas baboons.  
713 *American Journal of Physical Anthropology* 158: 501-513.

714 Clarke, I.J. (2014). Interface between metabolic balance and reproduction in  
715 ruminants: Focus on the hypothalamus and pituitary. *Hormones and*  
716 *Behavior* 66: 15-40.

717 Clauset, A., Shalizi, C.R., & Newman, M.E.J. (2009). Power-law distributions in  
718 empirical data. *SIAM Review* 51, 661-703.

719 Coulson, M.R. (1987). In the matter of class intervals for choropleth maps: with

720 particular reference to the work of George F. Jenks. *Cartographica* **24**, 16-39.

721 Cowlshaw, G. (1994). Vulnerability to predation in baboon populations.

722 *Behaviour* 131: 293-304.

723 Cowlshaw, G. (1997a). Trade-offs between foraging and predation risk determine

724 habitat use in a desert baboon population. *Animal Behaviour* 53: 667-686.

725 Cowlshaw, G. (1997b). Refuge use and predation risk in a desert baboon

726 population. *Animal Behaviour* 54: 241-253.

727 Crockford, C., Wittig, R.M., Whitten, P.L., Seyfarth, R.M. & Cheney, D.L. (2008).

728 Social stressors and coping mechanisms in wild female baboons (*Papio*

729 *hamadryas ursinus*). *Hormones and Behavior* 53: 254-265.

730 Dean, R.F.A. (1949). Women war captives in Russia. *British Medical Journal* 1: 691-

731 695.

732 Dobson, H., Fergani, C., Routly, J.E. & Smith, R.F. (2012). Effects of stress on

733 reproduction in ewes. *Animal Reproduction Science* 130: 135-140.

734 Dunbar, R.I.M. (1979). Population demography, social organisation and mating

735 strategies. In: I. Bernstein & E.O. Smith (eds) *Primate Ecology and Human*

736 *Origins*, pp. 65-88. New York: Garland.

737 Dunbar, R.I.M. (1980). Determinants and evolutionary consequences of dominance

738 among female gelada baboons. *Behavioural Ecology and Sociobiology* 7: 253-

739 265.

740 Dunbar, R.I.M. (1983a). Structure of gelada baboon reproductive units. IV. Organisation

741 at group level. *Zeitschrift für Tierpsychologie* 63: 265-282.

742 Dunbar, R.I.M. (1983b). Structure of social relationships in nonsavannah baboons. In:

743 R.A. Hinde (ed) *Primate Social Relationships*, pp. 299-307. Oxford: Blackwells.

744 Dunbar, R.I.M. (1984). *Reproductive Decisions: An Economic Analysis of Gelada*

- 745 *Baboon Social Strategies*. Princeton NJ: Princeton University Press.
- 746 Dunbar, R.I.M. (1988). Habitat quality, population dynamics and group composition in  
747 colobus monkeys (*Colobus guereza*). *International Journal of Primatology* 9:  
748 299-329.
- 749 Dunbar, R.I.M. (1991). Functional significance of social grooming in primates. *Folia*  
750 *Primatologica* 57: 121-131.
- 751 Dunbar, R.I.M. (2012). Bridging the bonding gap: the transition from primates to  
752 humans. *Philosophical Transactions of the Royal Society, London*, 367B:  
753 1837-1846.
- 754 Dunbar, R.I.M. (2018). Social structure as a strategy to mitigate the costs of group-  
755 living: a comparison of gelada and guereza monkeys. *Animal Behaviour* 136:  
756 53-64.
- 757 Dunbar, R.I.M. & Bose, U. (1991). Adaptation to grass eating in gelada baboons.  
758 *Primates* 32: 1-7.
- 759 Dunbar, R.I.M. & Dunbar, P. (1975). *Social Dynamics of Gelada Baboons*. Basel:  
760 Karger.
- 761 Dunbar, R.I.M., Mac Carron, P. & Robertson, C. (2018a). Tradeoff between fertility  
762 and predation risk drives a geometric sequence in the pattern of group sizes in  
763 baboons. *Biology Letters* 14: 20170700.
- 764 Dunbar, R.I.M., Mac Carron, P. & Shultz, S. (2018b). Primate social group sizes  
765 exhibit a regular scaling pattern with natural attractors. *Biology Letters* 14:  
766 20170490.
- 767 Dunbar, R.I.M. & Nathan, M. (1972). Social organisation of the Guinea baboon, *Papio*  
768 *papio*, in Senegal. *Folia Primatologica* 17: 321-334.
- 769 Dunbar, R.I.M. & Shultz, S. (2010). Bondedness and sociality. *Behaviour* 147: 775-803.



- 770 Dunbar, R.I.M. & Shultz, S. (2017). Why are there so many explanations for primate  
771 brain evolution? *Philosophical Transactions of the Royal Society, London*,  
772 244B: 201602244.
- 773 Dunbar, R.I.M. & Sosis, R. (2017). Optimising human community sizes. *Evolution*  
774 *and Human Behavior* 39: 106-111.
- 775 Dunbar, R.I.M., Korstjens, A.H. & Lehmann, J. (2009). Time as an ecological  
776 constraint. *Biological Reviews* 84: 413-429.
- 777 Dunbar, R.I.M., Mac Carron, P. & Shultz, S. (2018). Fractal patterning of social  
778 group size in primates. *Biology Letters* 14: 20170490.
- 779 Einarsson, S., Brandt, Y., Lundeheim, N. & Madej, A. (2008). Stress and its influence  
780 on reproduction in pigs: a review. *Acta Veterinaria Scandinavica* 50: 1-48.
- 781 Garcia, C., Lee, P.C. & Rosetta, L. (2006). Dominance and reproductive rates in  
782 captive female olive baboons, *Papio anubis*. *American Journal of Physical*  
783 *Anthropology* 131: 64-72.
- 784 Harcourt, A.H. & Greenberg, J. (2001). Do gorilla females join males to avoid  
785 infanticide? A quantitative model. *Animal Behaviour* 62: 905-915.
- 786 Hawkins, D. (1999). *Behaviour and Ecology of Baboons in the Mikumi National*  
787 *Park, Tanzania*. PhD thesis, University of Liverpool.
- 788 Henzi, S.P., Lycett, J.E., Piper, S.E. (1997). Fission and troop size in a mountain  
789 baboon population. *Animal Behaviour* 53: 525-535.
- 790 Higham, J.P., Warren, Y., Adanu, J., Umaru, B.N., MacLarnon, A.M., Sommer, V. &  
791 Ross, C. (2009). Living on the edge: life-history of olive baboons at Gashaka-  
792 Gumti National Park, Nigeria. *American Journal of Primatology* 71: 293-304.
- 793 Hill, R.A., Lycett, J. & Dunbar, R.I.M. (2000). Ecological determinants of birth intervals  
794 in baboons. *Behavioral Ecology* 11: 560-564.

795 van Horn, R.C., Buchan, J.C., Altmann, J. & Altberts, S.C. (2007). Divided destinies:  
796 group choice by female savannah baboons during social group  
797 fission. *Behavioural Ecology and Sociobiology* 61: 1823-1837.

798 Jain, A. K. (2010). Data clustering: 50 years beyond K-means. *Pattern Recognition*  
799 *Letters* 31: 651-666.

800 Jenks, G.F. (1967). The data model concept in statistical mapping. *International*  
801 *Yearbook of Cartography* 7: 186-190.

802 Ji, T., Wu, J.J., He, Q.Q., Xu, J.J., Mace, R. & Tao, Y. (2013). Reproductive  
803 competition between females in the matrilineal Mosuo of southwestern China.  
804 *Philosophical Transactions of the Royal Society, London*, 368B: 20130081.

805 Jolly, C.J. (2007). Baboons, mandrills, and mangabeys: Afro-papionin socioecology  
806 in a phylogenetic perspective. In: C. Campbell, A. Fuentes, K. MacKinnon, S.  
807 Bearder & R. Stumpf (eds.) *Primates in Perspective*, pp. 240-251. Oxford:  
808 Oxford University Press.

809 Kahlenberg, S.M., Thompson, M.E., Muller, M.N. & Wrangham, R.W. (2008).  
810 Immigration costs for female chimpanzees and male protection as an  
811 immigrant counterstrategy to intrasexual aggression *Animal Behaviour* 76:  
812 1497-1509.

813 Kalra, S.P. & Kalra, P.S. (1996). Nutritional infertility: the role of the interconnected  
814 hypothalamic neuropeptide Y–galanin–opioid network." *Frontiers in*  
815 *Neuroendocrinology* 17: 371-401.

816 Kirchengast, S. & Huber, J. (2001). Fat distribution patterns in young amenorrheic  
817 females. *Human Nature* 12: 123-140.

818 Korstjens, A.H., Verhoeckx, I. & Dunbar, R.I.M. (2006). Time as a constraint on group  
819 size in spider monkeys. *Behavioural Ecology and Sociobiology* 60: 683-694.

- 820 Krause, J. & Ruxton, G. (2002). *Living in Groups*. Oxford: Oxford University Press.
- 821 Kudo, H. & Dunbar, R.I.M. (2001). Neocortex size and social network size in primates.
- 822 *Animal Behaviour* 62: 711-722.
- 823 Kummer, H. (1968). *Social Organisation of Hamadryas Baboons*. Basel: Karger.
- 824 Laatikainen, T.J. (1991). Corticotropin-releasing hormone and opioid peptides in
- 825 reproduction and stress. *Annals of Medicine* 23: 489-496.
- 826 Lehmann, J. & Dunbar, R.I.M. (2009a). Implications of body mass and predation for
- 827 ape social system and biogeographical distribution. *Oikos* 118: 379-390.
- 828 Lehmann, J. & Dunbar, R.I.M. (2009b). Network cohesion, group size and neocortex
- 829 size in female-bonded Old World primates. *Proceedings of the Royal Society,*
- 830 *London*, 276B: 4417-4422.
- 831 Lehmann, J., Korstjens, A.H. & Dunbar, R.I.M. (2007a). Group size, grooming and
- 832 social cohesion in primates. *Animal Behaviour* 74: 1617-1629.
- 833 Lehmann, J., Korstjens, A.H. & Dunbar, R.I.M. (2007b). Fission-fusion social
- 834 systems as a strategy for coping with ecological constraints: a primate case.
- 835 *Evolutionary Ecology* 21: 613-634.
- 836 Linklater, W.L., Cameron, E., Minor, E.O. & Stafford, K.J. (1999). Stallion
- 837 harassment and the mating system of horses. *Animal Behaviour* 58: 295-306.
- 838 Mac Carron, P. & Dunbar, R.I.M. (2016). Identifying natural grouping structure in
- 839 gelada baboons: a network approach. *Animal Behaviour* 114: 119-128.
- 840 McClure, T.J. (1968). Malnutrition and infertility of cattle in Australia and New
- 841 Zealand. *Australian Veterinary Journal* 44: 134-138.
- 842 Markham, A.C., Guesquiere, L.R., Alberts, S.C. & Altmann, J. (2015). Optimal group
- 843 size in a highly social mammal. *Proceedings of the National Academy of*
- 844 *Sciences, USA*, 112: 14882-14887.

- 845 Massen, J.J.M., Sterck, E.H.M. & de Vos, H. (2010). Close social associations in  
846 animals and humans: functions and mechanisms of friendship. *Behaviour* 147:  
847 1379–1412.
- 848 Ménard, N., & Vallet, D. (1993). Dynamics of fission in a wild Barbary macaque  
849 group (*Macaca sylvanus*). *International Journal of Primatology* 14: 479-500.
- 850 Mesnick, S.L. (1997). Sexual alliances: evidence and evolutionary implications. In:  
851 P.A. Gowaty (ed.) *Feminism and Evolutionary Biology*, pp. 207–60. London:  
852 Chapman & Hall.
- 853 Mori, A., Iwamoto, T., Mori, U. & Bekele, A. (1999). Sociological and demographic  
854 characteristics of a recently found Arsi gelada population in Ethiopia.  
855 *Primates* 40:365-381.
- 856 Muhsam, H.V. (1956). Fertility of polygamous marriages. *Population Studies* 10: 3-  
857 16.
- 858 Nagel, U. (1973). A comparison of anubis baboons, hamadryas baboons and their  
859 hybrids at a species border in Ethiopia. *Folia Primatologica* 19: 104-165.
- 860 Nuñez, C.M.V., Adelman, J.S. & Rubenstein, D.I. (2015). Sociality increases juvenile  
861 survival after a catastrophic event in the feral horse (*Equus caballus*).  
862 *Behavioral Ecology* 26: 138–147.
- 863 Ohsawa, H. & Dunbar, R.I.M. (1984). Variations in the demographic structure and  
864 dynamics of gelada baboon populations. *Behavioural Ecology and*  
865 *Sociobiology* 15: 231-240.
- 866 Patzelt, A., Zinner, D., Fickenscher, g., Dieghou, S., Camara, B., Stahl, D. & Fischer,  
867 J. (2011). Group composition of Guinea baboons (*Papio papio*) at a water  
868 place suggests a fluid social organization. *International Journal of*  
869 *Primatology* 32: 652-668.

870 Pettay, J.E., Lahdenperä, M., Rotkirch, A. & Lummaa, V. (2016). Costly reproductive  
871 competition between co-resident females in humans. *Behavioral Ecology* 27:  
872 1601-1608.

873 Pusey, A.E. & Schroepfer-Walker, K. (2013). Female competition in  
874 chimpanzees. *Philosophical Transactions of the Royal Society, London*, 36B8:  
875 20130077.

876 van Schaik, C.P. (1983). Why are diurnal primates living in groups? *Behaviour* 87:  
877 120-144.

878 Schliep, K.C., Mumford, S.L., Vladutiu, C.J., Ahrens, K.A., et al. (2015). Perceived  
879 stress, reproductive hormones, and ovulatory function: a prospective cohort  
880 study. *Epidemiology* 26: 177-184.

881 Schreier, A.L. & Swedell, L. (2012a). Ecology and sociality in a multilevel society:  
882 ecological determinants of spatial cohesion in hamadryas baboons. *American*  
883 *Journal of Physical Anthropology* 148: 580-588.

884 Schreier, A. & Swedell, L. (2012b). The socioecology of network scaling ratios in the  
885 multilevel society of hamadryas baboons. *International Journal of*  
886 *Primatology* 33: 1069-1080.

887 Schwartz, M.W. & Seeley, R.J. (1997). Neuroendocrine responses to starvation and  
888 weight loss. *New England Journal of Medicine* 336: 1802-1811.

889 Seifer, D.B. & Collins, R.L. (1990). Current concepts of  $\beta$ -endorphin physiology in  
890 female reproductive dysfunction. *Fertility and Sterility* 54: 757-771.

891 Sharman, M. (1981). *Feeding, Ranging and Social Organization of the Guinea*  
892 *Baboon*. PhD thesis, University of St. Andrews.

893 Shultz, S. & Dunbar, R.I.M. (2010). Encephalisation is not a universal  
894 macroevolutionary phenomenon in mammals but is associated with sociality.

895 *Proceedings of the National Academy of Sciences, USA*, **107**, 21582-21586.

896 Shultz, S. & Finlayson, L.V. (2010). Large body and small brain and group sizes are  
897 associated with predator preferences for mammalian prey. *Behavioral Ecology*  
898 21: 1073-1079.

899 Shultz, S., Noe, R., McGraw, S. & Dunbar, R.I.M. (2004). A community-level  
900 evaluation of the impact of prey behavioural and ecological characteristics on  
901 predator diet composition. *Proceedings of the Royal Society, London*, 271B:  
902 725-732.

903 Sigg, H. & Stolba, A. (1981). Home range and daily march in a hamdryas baboon  
904 troop. *Folia Primatologica* 36: 40-75.

905 Sigg, H., Stolba, A., Abegglen, J.-J. & Dasser, V. (1982). Life history of hamadryas  
906 baboons: physical development, infant mortality, reproductive parameters and  
907 family relationships. *Primates* 23: 473-487.

908 Silk, J.B., Alberts, S.C. & Altmann, J. (2003). Social bonds of female baboons  
909 enhance infant survival. *Science* **302**, 1232-1234.

910 Silk, J.B., Beehner, J.C., Bergman, T.J., Crockford, C., Engh, A.L., Moscovice, L.R.,  
911 et al. (2009). The benefits of social capital: close social bonds among female  
912 baboons enhance offspring survival. *Proceedings of the Royal Society,*  
913 *London*, 276B: 3099-3104.

914 Silk, J.B., Beehner, J.C., Bergman, T.J., Crockford, C., Engh, A.L., Moscovice, L.R.,  
915 et al. (2010). Strong and consistent social bonds enhance the longevity of  
916 female baboons. *Current Biology* 20: 1359-1361.

917 Smith, C.A. (1947). The effect of wartime starvation in Holland upon pregnancy and  
918 its product. *American Journal of Obstetrics and Gynecology* 53: 599-608.

919 Smith, J.E., & Kunz, P.R. (1976) Polygyny and fertility in nineteenth century  
920 America. *Population Studies* 30: 465-480.

921 Smuts, B.B. & Nicholson, N. (1989). Dominance rank and reproduction in female  
922 baboons. *American Journal of Primatology* 19: 229-246.

923 Srivastava, A. & Dunbar, R.I.M. (1996). The mating system of hanuman langurs: a  
924 problem in optimal foraging. *Behavioural Ecology and Sociobiology* 39: 219-  
925 226.

926 Städele, V., Pines, M., Swedell, L. & Vigilant, L. (2016). The ties that bind: maternal  
927 kin bias in a multilevel primate society despite natal dispersal by both Sexes.  
928 *American Journal of Primatology* 78: 731-744.

929 Swedell, L. (2002). Affiliation among females in wild hamadryas baboons (*Papio*  
930 *hamadryas hamadryas*). *International Journal of Primatology* 23: 1205-1226.

931 Swedell, L. & Saunders, J. (2006). Infant mortality, paternity certainty, and female  
932 reproductive strategies in hamadryas baboons. In: L. Swedell & S. Leigh (eds)  
933 *Reproduction and Fitness in Baboons: Behavioral, Ecological, and Life*  
934 *History Perspectives*, pp. 19-51. New York: Springer.

935 Warren, M.P. & Perlroth, N. E. (2001). The effects of intense exercise on the female  
936 reproductive system. *Journal of Endocrinology* 170: 3-11.

937 Willems, E. & Hill, R.A. (2009). Predator-specific landscapes of fear and resource  
938 distribution: effects on spatial range use. *Ecology* 90: 546–555.

939 Wilson, M. & Mesnick, S.L. (1997). An empirical test of the bodyguard hypothesis.  
940 In *Feminism and Evolutionary Biology* (ed. P.A. Gowaty) pp. 000-000.  
941 London: Chapman & Hall.

942 Wittig, R.M., Crockford, C., Lehmann, J., Whitten, P.L., Seyfarth, R.M. & Cheney,  
943 D.L. (2008). Focused grooming networks and stress alleviation in wild female  
944 baboons. *Hormones and Behavior* 54: 170-177.

945 Zacur, H.A., Chapanis, H.P., Lake, C.R., Ziegler, M. & Tyson, J.E. (1976).  
946 Galactorrhea-amenhorrea: psychological interaction with neuroendocrine  
947 function. *American Journal of Obstetrics and Gynecology* 125: 859-862.

948 Zinner, D., Peláez, F. & Torkler, F. (2001). Group composition and adult sex-ratio of  
949 hamadryas baboons (*Papio hamadryas hamadryas*) in central  
950 Eritrea. *International Journal of Primatology* 22: 415-430.

951 Zinner, D., Wertheimer, J., Liedigk, R., Groeneveld, L.F. & Roos, C. (2013). Baboon  
952 phylogeny as inferred from complete mitochondrial genomes. *American*  
953 *Journal of Physical Anthropology* 150: 133-140.

954

955



## Legends to Figures

Figure 1. Distribution of social group sizes in baboon (*Papio* and *Theropithecus*) populations. Dashed vertical lines demarcate the optimal group sizes of 18.7, 41.0, 79.1 and 180.3, averaged for the two the maximum likelihood estimates (see text for details).

Figure 2. Mean ( $\pm 2$  se) group size for individual species. Samples size are: *P. anubis* = 102, *P. cynocephalus* = 109, *P. ursinus* = 165, *P. hamadryas* = 13; *P. papio* = 34 groups; *Theropithecus gelada* = 22 groups.

Figure 3. Proportion of groups in populations with >4 censused groups that fell into the lowest oscillator (20/40) for all six species.

Figure 4. Mean ( $\pm 1$ se) population mean group size as a function of predator (lion + leopard) density (filled symbols:  $>0.25$  /km<sup>2</sup>; unfilled symbols:  $<0.25$ /km<sup>2</sup>) and percentage tree cover. Data: *ESM* Table S2.

Figure 5. Mean population group size plotted against a composite index of predation risk (standard deviation of predator density plus standard deviation of converse of tree cover [i.e. 100 - % tree cover]). Unfilled symbols: woodland baboon populations; filled symbols: hamadryas and gelada populations. Data: Table S2.

Figure 6. Mean group size for individual baboon populations, plotted against annual rainfall. Filled circles: woodland baboon populations; open circle: Guinea baboon population; triangles: hamadryas populations. The solid line gives the maximum ecologically tolerable group size ( $N_{max}$ ) determined by the time budget model, and the dashed line gives the minimum group size ( $N_{min}$ ) determined by predation risk, using the equations from Bettridge et al. (2010) and converting all climatic variables into functions of annual rainfall (using regression equations based on data given by Bettridge et al. 2010). Heavy solid line plots percentage of tree cover, based on data given for baboon study sites by Bettridge et al. (2010). See text for details.

Figure 7. Mean fertility (births per adult female per year) for individual baboon groups, plotted against group size. Filled circles: woodland baboons; open circles: Guinea baboons; solid triangles: hamadryas; open triangles: gelada. The best fit regression for the three woodland species combined has a quadratic form (solid line, with 95% CI indicated by dotted lines). A separate regression (dashed line) is set through the hamadryas and gelada datapoints, with a quadratic again being the best fit.

Figure 8. Group size over succeeding time units (years), given the birth rates shown in Fig. 7 for woodland species and an annual mortality rate varying across a normal distribution with a mean of 10% and varying between 4-16%, for different initial group sizes ( $N=15$  = dotted line;  $N=17$  = short dash;  $N=20$  = long dash;  $N=25$  = solid). The lines are mean values for 10,000 simulations in each case. If a group fissions at a size of  $\sim 60$ , it might do so into daughter

1005 groups of 20 and 40 (heavy arrows) or two groups of 30. Grey zone: region  
 1006 ( $N < 17$ ) within which a group will inevitably go extinct because its death rate  
 1007 will always exceed its birth rate.  
 1008  
 1009  
 1010

Table 1. AIC values for the model tested for the distribution of baboon group sizes.

The best-fit model (that with the lowest AIC value) is shown in bold.

| Distribution             | AIC           |
|--------------------------|---------------|
| Power law                | 4632.7        |
| Exponential              | 4006.5        |
| Truncated power law      | 4099.1        |
| Weibull                  | 3978.1        |
| Gaussian                 | 4061.6        |
| Log-normal               | 3914.6        |
| Geometric                | 4045.3        |
| Negative binomial        | 3967.5        |
| Poisson (single)         | 12829.6       |
| <b>Compound Poisson*</b> | <b>3207.0</b> |

\* A compound Poisson composed of four Poisson distributions with different means

Table 2. Optimal number of clusters, and the resulting cluster means and mean scaling ratios between successive clusters, for each of the species separately, compared to that for the pooled sample, using the Jenks algorithm.

| Species                     | Cluster means * |            |           |                        |  | Mean scaling ratio |
|-----------------------------|-----------------|------------|-----------|------------------------|--|--------------------|
| All <i>Papio</i> species    | 19.8 (202)      | 45.6 (138) | 79.1 (65) | 184.4 (17)             |  | 2.12               |
| <i>P. anubis</i>            | 22.1 (58)       | 49.3 (33)  | 94.1 (13) | -                      |  | 2.06               |
| <i>P. cynocephalus</i>      | 20.7 (32)       | 46.6 (41)  | 80.0 (28) | 176.0 (4)              |  | 2.06               |
| <i>P. ursinus</i>           | 17.8 (99)       | 37.1 (49)  | 64.9 (10) | 99.8 (8)               |  | 1.79               |
| <i>P. papio</i>             | -               | 42.0 (19)  | 113.0 (9) | 216.3 (6)              |  | 2.30               |
| <i>P. hamadryas</i>         | -               | 52.7 (7)   | 88.0 (3)  | 190.0 <sup>§</sup> (3) |  | 1.91               |
| <i>Theropithecus gelada</i> | -               | 54.8 (10)  | 131.0 (8) | 237.3 (4)              |  | 2.11               |

\* Numbers in parentheses in the body of the table are the number of groups assigned to the cluster by the algorithm.

§ Jenks gives four clusters, but the two largest contain only one and two groups, respectively, with cluster means of 150 and 210. The weighted average is 190.

**Figure 1**

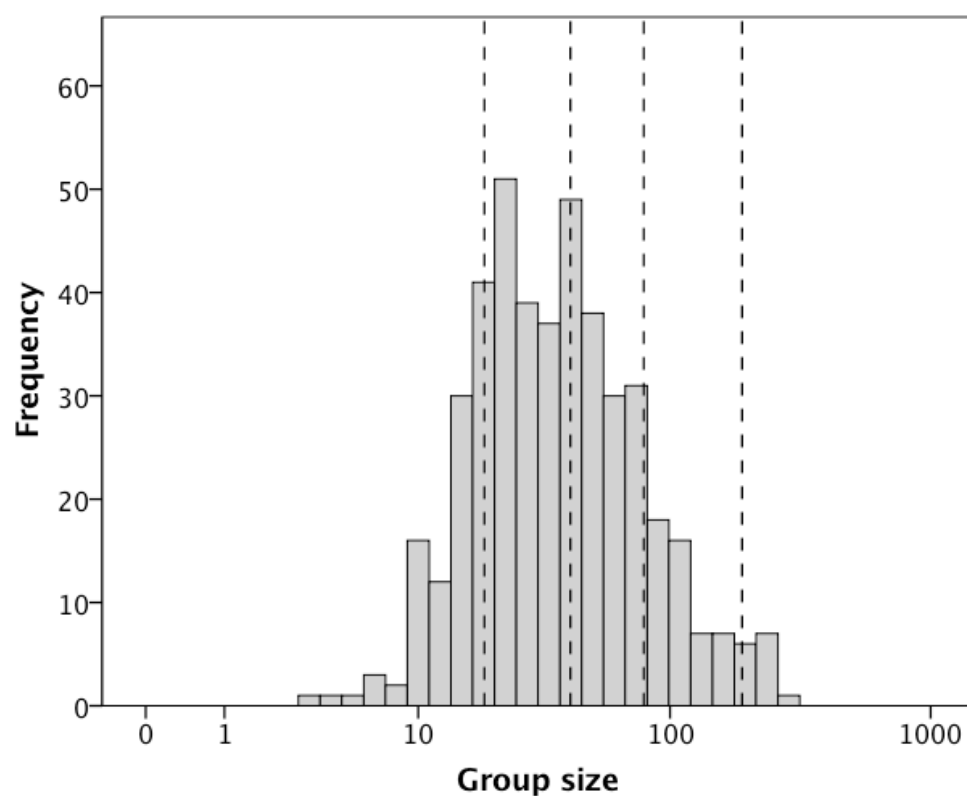

**Figure 2**

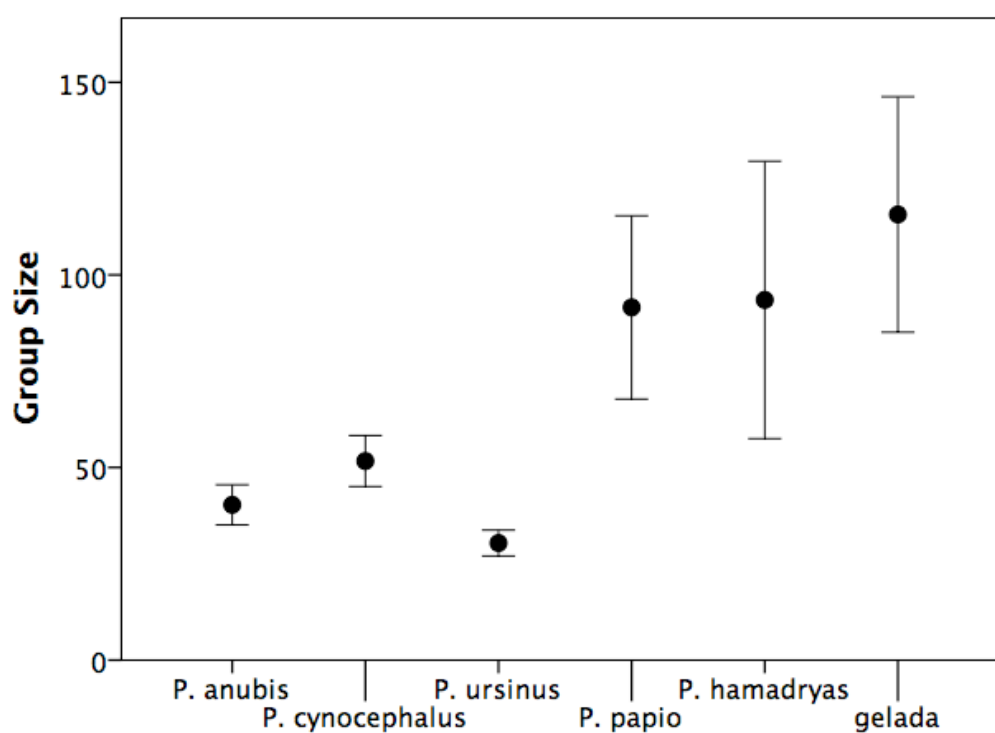

**Figure 3**

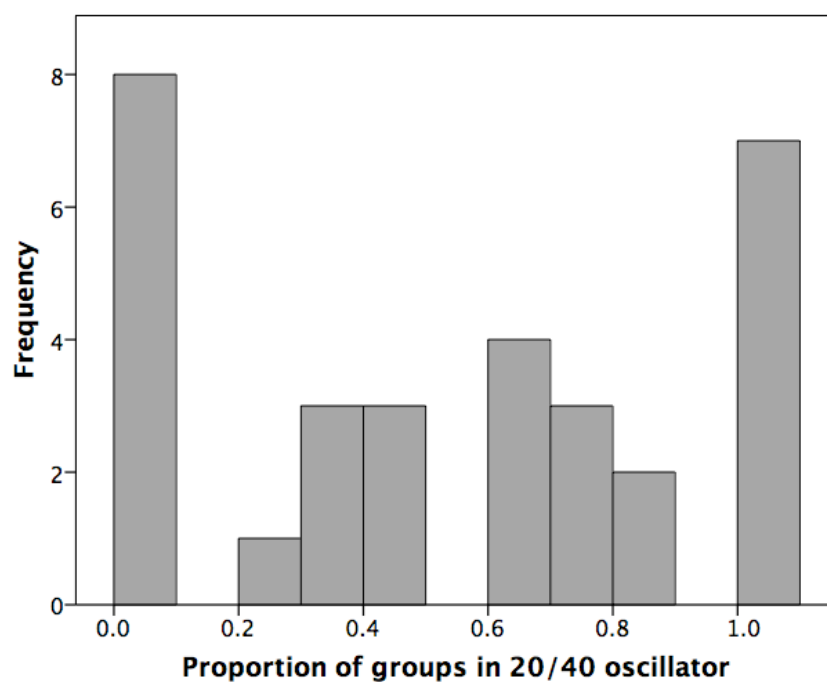



**Figure 4**

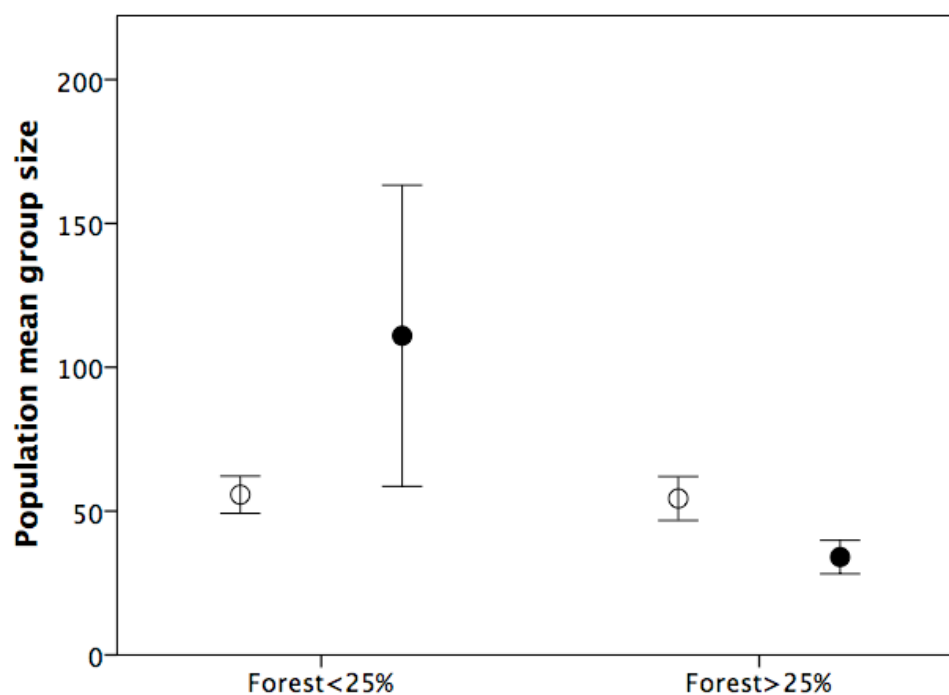

**Figure 5**

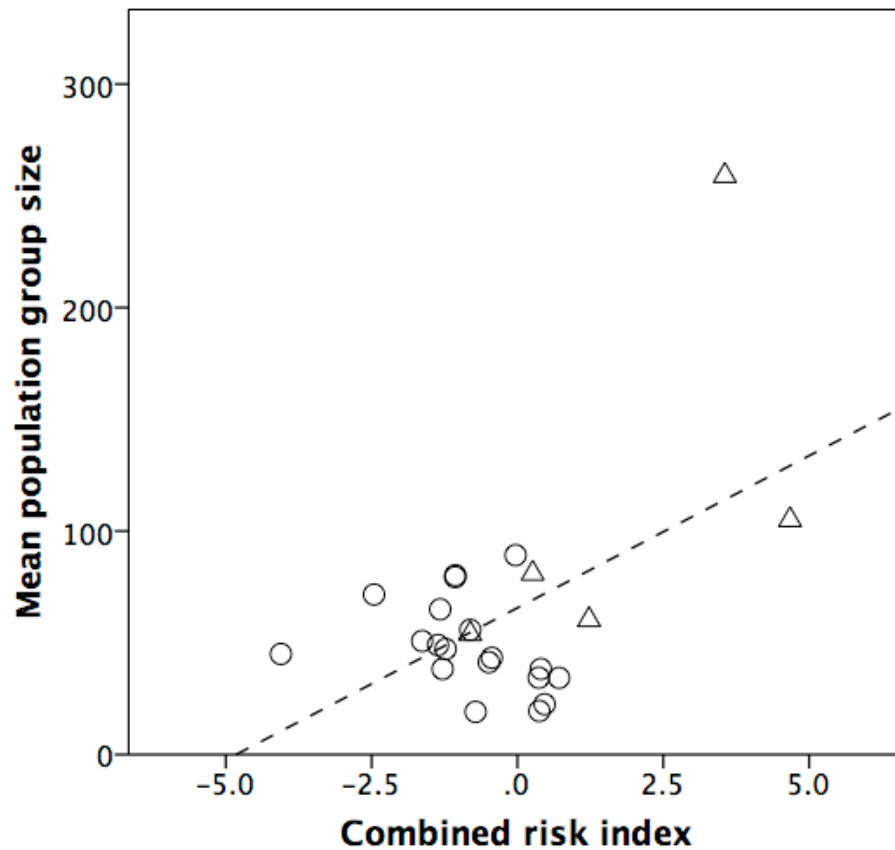

**Figure 6**

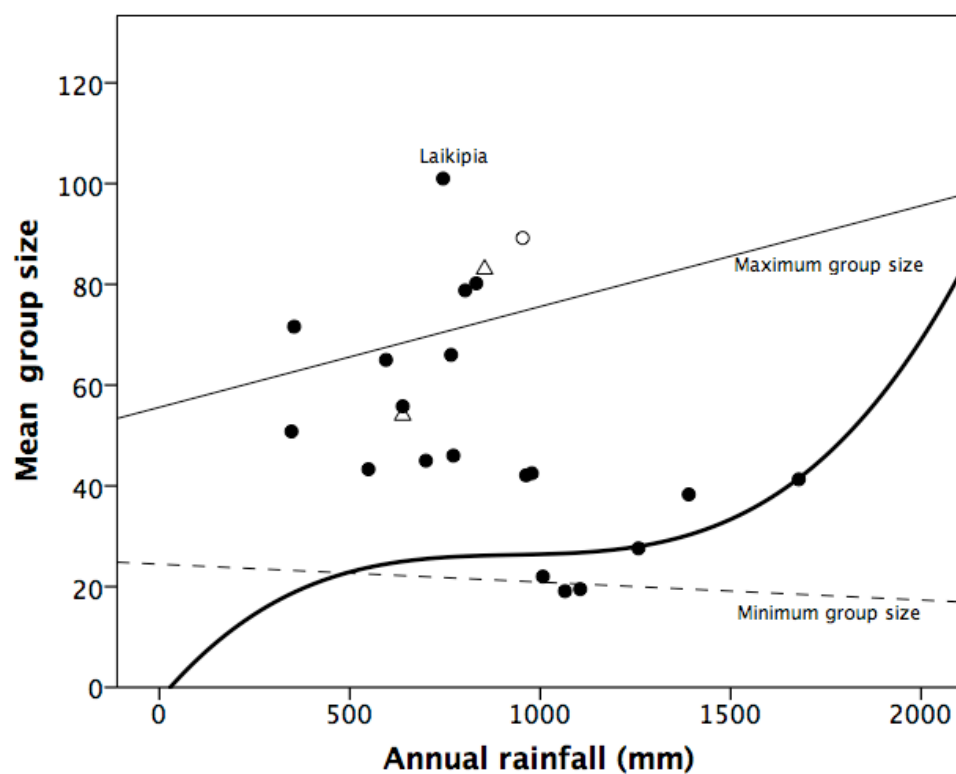

**Figure 7**

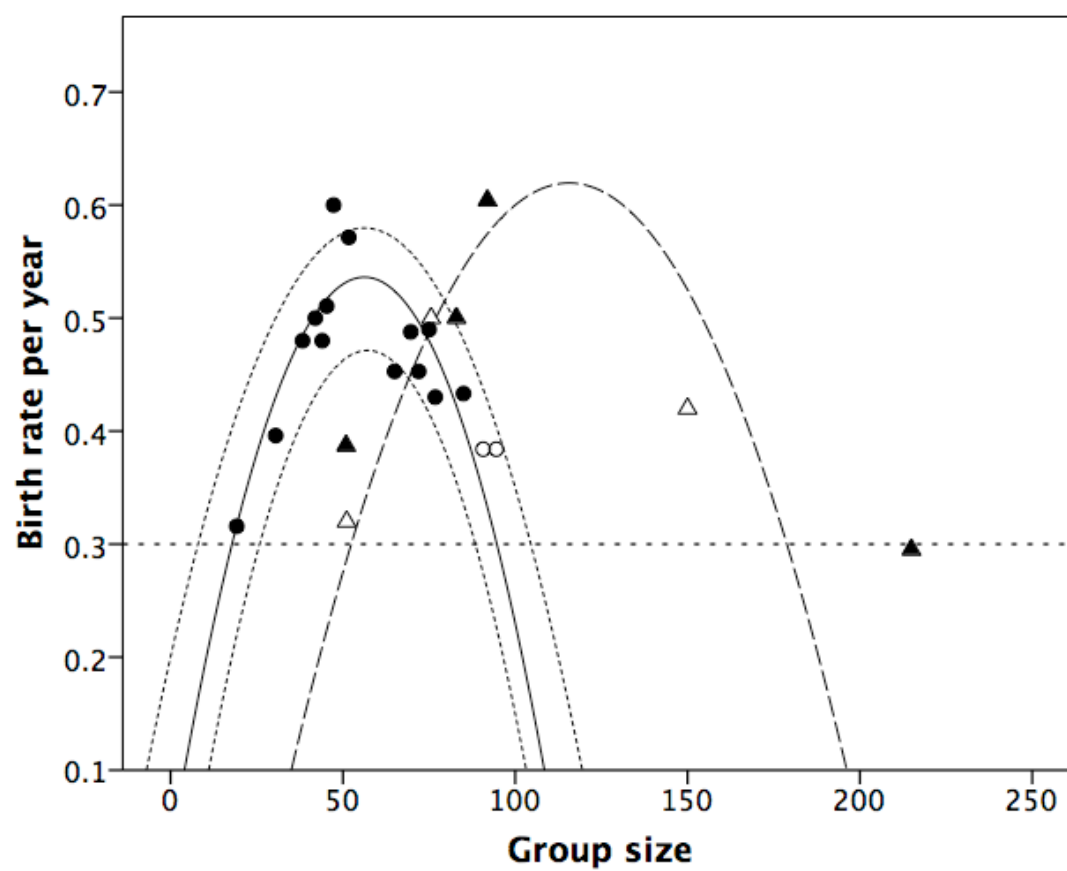

**Figure 8**

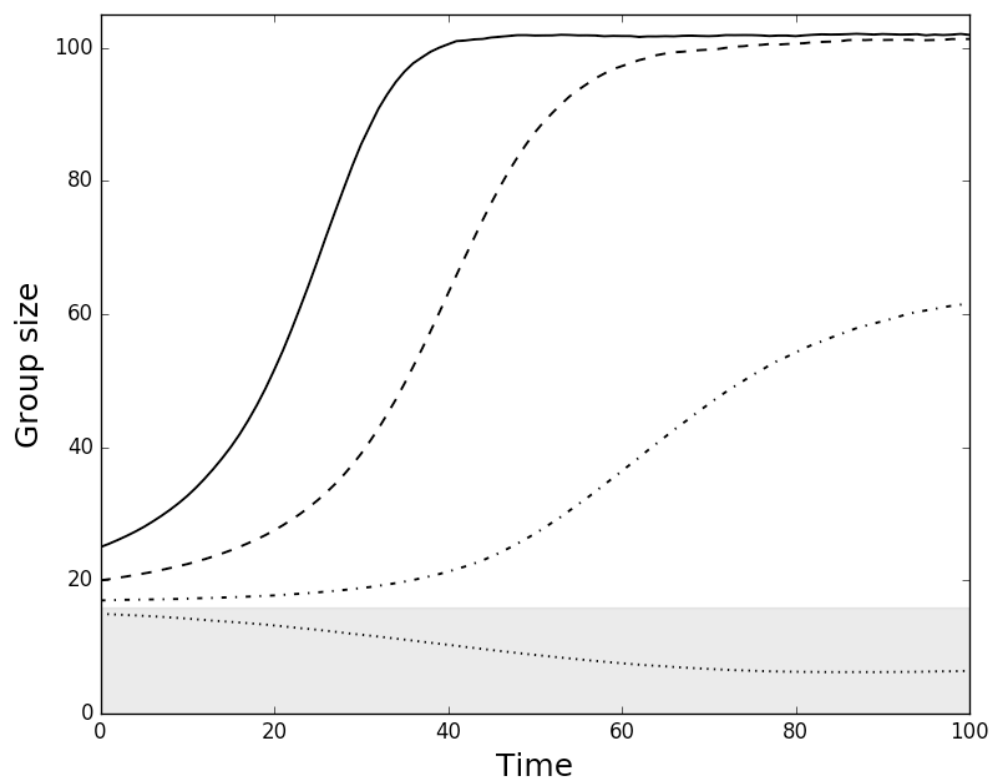

# **The Tradeoff Between Fertility and Predation Risk Drives a Fractal Pattern of Group Sizes in a Social Mammal (Baboons, Genus *Papio*)**

**R.I.M. Dunbar and Padraig Mac Carron**

## **Supplementary Information**

### *Supplementary Methods*

We take group (or troop) size to be that defined by the field worker: in most cases, this grouping is fairly obvious, since the animals forage and sleep together, and maintain a degree of demographic coherence and stability as well as spatial separation from other similar groups. For *Papio hamadryas*, we follow convention and take the band to be the homologue of the *Papio* troop – a set of animals that share the same home range (Kummer 1968). Exactly what counts as a group in *Papio papio* has been the subject of debate because of this species' rather flexible form of sociality (Dunbar & Nathan 1972; Boese 1975; Sharman 1981), but all field workers on this species agree on the existence of some form of stable social group, at least as defined by animals that share a common range area (Patzelt et al. 2011). The data are provided in the SI Table S1.

In most cases, fertility rates are based on observed mean birth rate or mean interbirth interval. In a few cases, birth rates were estimated from the number of immatures per female in a group. Immatures are defined as animals that are pre-puberty, with puberty occurring at around 4 years of age (Altmann et al. 1977). In the case of the gelada, we have used mean herd size rather than band size as the appropriate social grouping for comparison with the other *Papio* species: this is because gelada bands are probably not the homologue of baboon troops (MacCarron & Dunbar 2016) but rather are loose clusterings of harems that share a common range area. Not all the units of a band are found together on any given day (herd sizes vary from a single harem to upwards of 50 harems from several bands). Given that the driver of functional infertility is the number of individuals who are foraging or resting together at any given time, mean herd size seems the most appropriate measure.

### *Supplementary Results*

Fig. S1 plots the distribution of forest cover at sites listed by Bettridge et al. (2010) where the six species have been studied in detail, with gelada habitats from Iwamoto &

Dunbar (1983). For *Papio* species, forest cover is estimated from satellite imagery; that those for the gelada sites are based on ground transects carried out by the authors. Hamadryas and gelada live in habitats with especially low levels of forest cover. Note, however, that these data underestimate the contrast between hamadryas and gelada habitats and those occupied by other baboon species: the size of trees is much smaller in most hamadryas and gelada habitats than those in the habitats occupied by the other woodland baboon species. In gelada habitats, for example, few trees are over 5m in height.

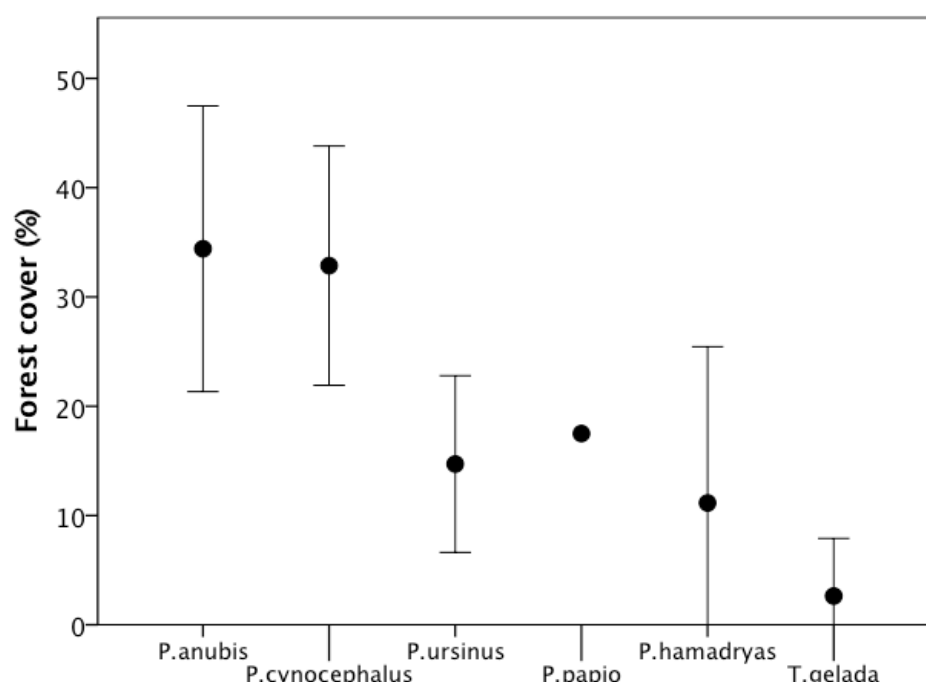

Fig. S1

Mean ( $\pm 2$  se) forest cover (indexed as percentage of ground cover) for the six species.  
Sources: Bettridge et al. (2010) and Iwamoto & Dunbar (1983)

Baboon fertility is independently predicted by both the number of adult females in the group and the mean ambient temperature of the habitat (an index of habitat quality) (Hill et al. 2000). To check whether environmental conditions might be a confound in our results, we regressed birth rate on mean habitat ambient temperature as a quadratic relationship ( $b = -0.672 + 0.104\text{Temp} - 0.00231 \cdot \text{Temp}^2$ ;  $F_{2,18}=3.77$ ,  $r^2=0.296$ ,  $p=0.043$ ; linear:  $F_{1,19}=0.01$ ,  $r^2=0.000$ ,  $p=0.933$ ), and calculated residual birth rates from this regression. The results (Fig. S2) are identical to those shown in Fig. 3. Gelada were not included in this analysis because they inhabit a different (very high altitude) temperature regime to *Papio* baboons.

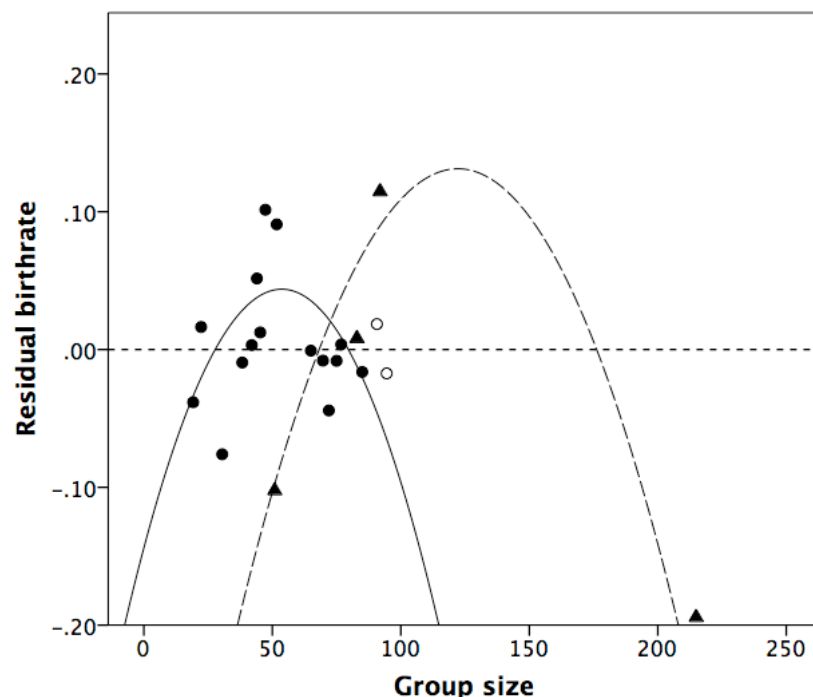

Figure S2

Residual of mean birth rate regressed on mean local temperature plotted against group size for individual populations. Filled circles: savannah baboons (*P. anubis*, *P. cynocephalus* and *P. ursinus*); unfilled circles: *P. papio*; triangles: *P. hamadryas*. Separate quadratic regressions set to data for savannah baboons and *P. hamadryas*, respectively. Gelada are not included (see text).

Fig. S3 confirms that the results of Fig. 3 are invariant with social scale: the same U-shaped pattern emerges when birth rate is plotted against the largest social groupings observed in the two species that live in multi-level social groupings (hamadryas baboons and gelada). The fit, however, is better for Fig. 3, which uses foraging group size (bands for hamadryas, mean herd size for gelada), the groupings in which the animals spend most of their time (and hence where stress effects are likely to be most intense).

Overall, the average number of females in baboon groups is  $14.5 \pm 6.9$ , and average group size is  $50.3 \pm 21.4$  ( $N=16$ ), for a ratio of 0.288. Fig. S5 plots the data for these groups: the regression line has a slope of  $\sim 3$ . The mean ratio of females to total group size for these individual groups is  $0.282 \pm 0.05$ . In fact, this value seems to be characteristic across primates as a whole (data in Campbell et al. 2007).



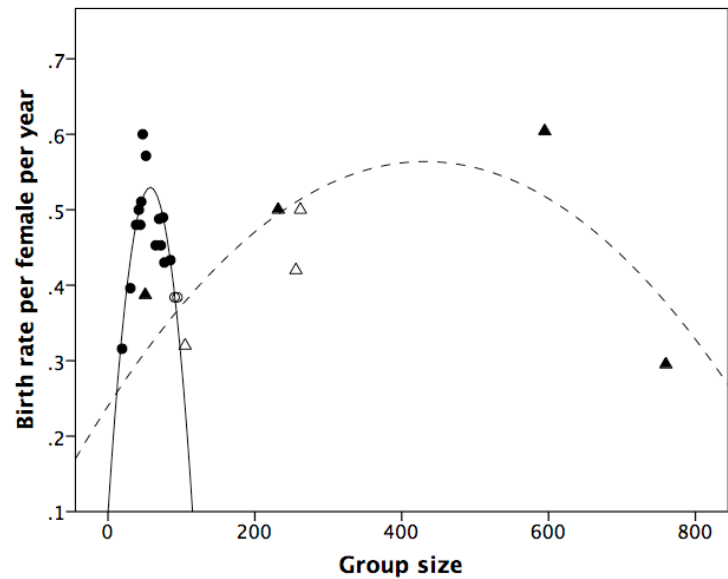

Figure S4

Birth rate plotted against highest level of social grouping (multi-band sleeping troop in the case of *Papio hamadryas* and band in the case of *Theropithecus gelada*). Filled circles: savannah baboons (*P. anubis*, *P. cynocephalus* and *P. ursinus*); unfilled circles: *P. papio*; solid triangles: *P. hamadryas*. Separate quadratic regressions set to data for savannah baboons and *P. hamadryas*, respectively.

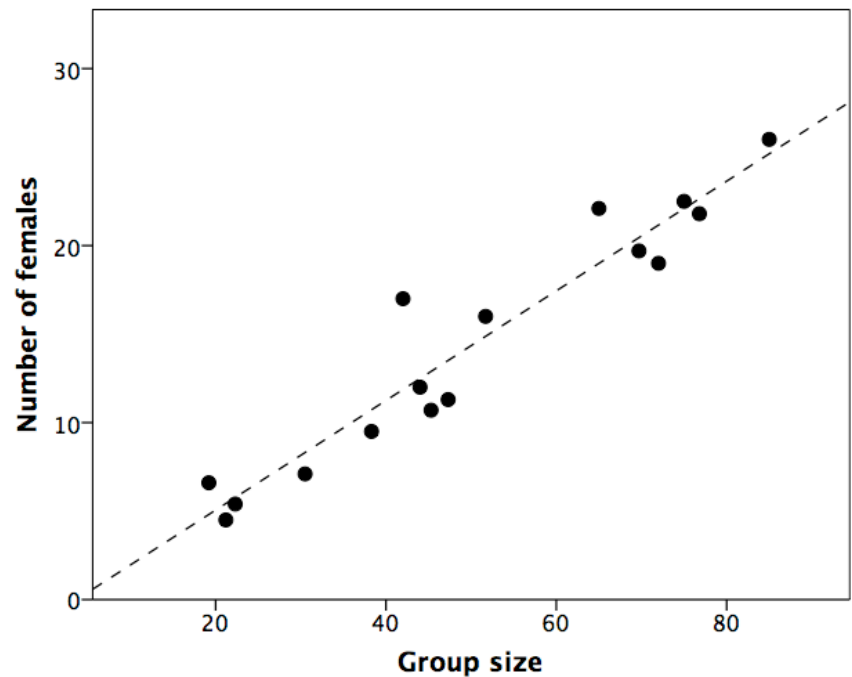

Figure S5

Number of females plotted against total group size for all the savannah baboon groups in the fertility sample. The dashed line is the best fit linear regression and has a slope of  $\sim 0.3$ .

# REFERENCES

- Bettridge, C., Lehmann, J. & Dunbar, R.I.M. (2010). Trade-offs between time, predation risk and life history, and their implications for biogeography: a systems modelling approach with a primate case study. *Ecol. Modelling* 221: 777-790.
- Boese, G.K. (1975). Social behaviour and ecological considerations of West African baboons (*Papio papio*). In: R.H. Tuttle (ed.) *Socioecology and Psychology of Primates*, pp. 205-230. The Hague: Mouton.
- Campbell, C.J., Fuentes, A., Mackinnon, K.C., Panger, M. & Bearder, S.K. (eds) (2007). *Primates in Perspective*. Oxford: Oxford University Press.
- Dunbar, R.I.M. & Nathan, M. (1972). Social organisation of the Guinea baboon, *Papio papio*, in Senegal. *Folia Primatologica* 17: 321-334.
- Hill, R.A., Lycett, J. & Dunbar, R.I.M. (2000). Ecological determinants of birth intervals in baboons. *Behavioural Ecology* 11: 560-564.
- Iwamoto, T. & Dunbar, R.I.M. (1983). Thermoregulation, habitat quality and the behavioural ecology of gelada baboons. *Journal of Animal Ecology* 52: 357-366.
- Kummer, H. (1968). *Social Organisation of Hamadryas Baboons*. Basel: Karger.
- MacCarron, P. & Dunbar, R.I.M. (2016). Identifying natural grouping structure in gelada baboons: a network approach. *Animal Behaviour* 114: 119-128.
- Patzelt, A., Zinner, D., Fickenscher, g., Dieghou, S., Camara, B., Stahl, D. & Fischer, J. (2011). Group composition of Guinea baboons (*Papio papio*) at a water place suggests a fluid social organization. *International Journal of Primatology* 32: 652-668.
- Sharman, M. (1981). *Feeding, Ranging and Social Organization of the Guinea Baboon*. PhD thesis, University of St. Andrews.
